# Supplementary material for: The Water Extract of Rhubarb Prevents Ischemic Stroke by Regulating Gut Bacteria and Metabolic Pathways
Source: MDPI journal article supplement (doi:10.3390/metabo14040216), 2024-04-12
Supplement: s1 [file s1]

**Supplementary Table S2. The list of identified metabolites from <sup>1</sup>H-NMR spectra of the MCAO and RR treated rats' serum samples.**

| No. | Metabolites               | Chemical shift<br>(ppm)(multiplicity)           | Model VS Sham |      |                 | RR-L VS MCAO |      |                 | RR-M VS MCAO |      |                 | RR-H VS MCAO |      |                 |
|-----|---------------------------|-------------------------------------------------|---------------|------|-----------------|--------------|------|-----------------|--------------|------|-----------------|--------------|------|-----------------|
|     |                           |                                                 | VIP           | FC   | <i>p</i> -value | VIP          | FC   | <i>p</i> -value | VIP          | FC   | <i>p</i> -value | VIP          | FC   | <i>p</i> -value |
| 1   | 2-Hydroxybutyrate         | <b>0.90(t)</b> , 4.00(m)                        | 1.29          | 0.67 | 0.046           | 1.21         | 1.19 | 0.081           | <1           | 1.00 | 0.972           | <1           | 1.06 | 0.567           |
| 2   | Isoleucine                | <b>0.94(t)</b> , 1.01(d),<br>3.68(d)            | 1.52          | 1.25 | 0.005           | 1.32         | 0.95 | 0.558           | 1.93         | 0.81 | 0.001           | 1.02         | 0.92 | 0.324           |
| 3   | Leucine                   | 0.96(d), <b>0.97(d)</b> ,<br>1.718(m), 3.740(m) | 2.15          | 1.44 | 0               | 1.15         | 0.99 | 0.882           | 1.86         | 0.89 | 0.05            | <1           | 1.00 | 0.995           |
| 4   | Valine                    | 0.99(d), <b>1.05(d)</b> ,<br>2.281(m), 3.617(d) | 2.23          | 1.48 | 0               | 1.07         | 0.98 | 0.793           | 1.48         | 0.86 | 0.015           | <1           | 0.97 | 0.788           |
| 5   | 3-Hydroxyisobutyrate      | <b>1.08(d)</b>                                  | 2.10          | 1.38 | 0               | 1.10         | 0.96 | 0.5             | 1.05         | 0.90 | 0.116           | <1           | 0.94 | 0.595           |
| 6   | Propylene glycol          | <b>1.14(d)</b>                                  | 1.36          | 0.60 | 0.023           | 1.81         | 1.49 | 0.046           | 1.11         | 1.10 | 0.674           | 1.33         | 1.35 | 0.108           |
| 7   | 3-Aminoisobutyric<br>acid | <b>1.23(d)</b> , 2.59(m)                        | 1.83          | 1.27 | 0.004           | 1.87         | 0.85 | 0.057           | 1.54         | 0.85 | 0.038           | 2.03         | 0.84 | 0.016           |
| 8   | N6-Acetyllysine           | 1.95(s)                                         | 1.53          | 1.23 | 0.014           | 1.40         | 0.90 | 0.162           | 1.07         | 0.88 | 0.134           | 1.72         | 0.88 | 0.036           |
| 9   | Lipid                     | 2.05                                            | 1.99          | 1.24 | 0               | 1.73         | 0.90 | 0.109           | 2.00         | 0.86 | 0.003           | 2.45         | 0.85 | 0.001           |
| 10  | Glutamine                 | <b>2.16(m)</b> , 2.48(m)                        | 1.77          | 1.18 | 0.003           | 2.48         | 0.92 | 0.074           | <1           | 0.99 | 0.773           | <1           | 0.93 | 0.235           |
| 11  | Acetone                   | 2.23(s)                                         | 1.80          | 2.04 | 0               | 1.21         | 1.05 | 0.882           | <1           | 0.96 | 0.834           | <1           | 0.97 | 0.895           |
| 12  | Acetoacetate              | 2.29(s)                                         | 1.62          | 1.62 | 0.004           | <1           | 0.98 | 0.921           | <1           | 1.22 | 0.296           | <1           | 0.92 | 0.62            |
| 13  | Methionine                | 2.14(s), <b>2.67(m)</b>                         | 1.43          | 1.35 | 0.023           | 1.06         | 0.89 | 0.228           | 1.58         | 0.74 | 0.025           | <1           | 0.89 | 0.322           |

|    |                        |                                                                                  |      |      |       |      |      |       |      |      |       |      |      |       |
|----|------------------------|----------------------------------------------------------------------------------|------|------|-------|------|------|-------|------|------|-------|------|------|-------|
| 14 | N, N-Dimethylglycine   | 2.93(s)                                                                          | 1.27 | 0.87 | 0.041 | 1.01 | 1.10 | 0.292 | 1.01 | 1.08 | 0.21  | 1.75 | 1.15 | 0.017 |
| 15 | Creatine               | 3.05(s)                                                                          | 1.32 | 1.17 | 0.033 | <1   | 0.92 | 0.343 | <1   | 0.95 | 0.452 | <1   | 0.95 | 0.504 |
| 16 | Choline                | 3.21(s)                                                                          | 1.56 | 1.13 | 0.019 | 1.12 | 0.93 | 0.293 | 2.16 | 0.80 | 0     | 1.11 | 0.94 | 0.227 |
| 17 | Trimethylamine N-oxide | 3.27(s)                                                                          | 1.21 | 0.90 | 0.03  | <1   | 1.05 | 0.305 | <1   | 1.02 | 0.712 | 1.54 | 1.11 | 0.024 |
| 18 | Myo-inositol           | 3.62(t)                                                                          | 2.10 | 1.25 | 0     | 1.23 | 0.97 | 0.63  | 1.23 | 0.89 | 0.02  | <1   | 0.98 | 0.691 |
| 19 | Ethanol                | 3.68(q)                                                                          | 1.64 | 1.10 | 0.013 | 1.26 | 0.95 | 0.334 | 1.15 | 0.94 | 0.13  | <1   | 1.00 | 0.952 |
| 20 | Glucose                | 5.24(d), 4.64(d),<br>3.88(dd), <b>3.79(m)</b> ,<br>3.48(m), 3.40(m),<br>3.24(dd) | 1.94 | 0.86 | 0     | 1.94 | 1.14 | 0.01  | 1.46 | 1.12 | 0.017 | 1.31 | 1.10 | 0.049 |
| 21 | Betaine                | 3.3(s), <b>3.91(s)</b>                                                           | 1.80 | 0.86 | 0.001 | 1.65 | 1.14 | 0.042 | 1.25 | 1.10 | 0.075 | 1.44 | 1.15 | 0.037 |
| 22 | Serine                 | <b>3.95(d)</b> , 3.96(d),<br>3.986(d), 4.00(d)                                   | 1.59 | 1.12 | 0.004 | <1   | 0.97 | 0.41  | <1   | 1.00 | 0.99  | <1   | 0.97 | 0.497 |
| 23 | Lactate                | 1.33(d), <b>4.12(q)</b>                                                          | 1.59 | 1.21 | 0.013 | 1.91 | 0.82 | 0.01  | 1.91 | 0.78 | 0.002 | 1.83 | 0.83 | 0.038 |
| 24 | Threonine              | 1.32(d), <b>4.28(q)</b>                                                          | 1.75 | 1.62 | 0.027 | <1   | 0.80 | 0.254 | <1   | 0.92 | 0.669 | <1   | 0.87 | 0.4   |
| 25 | Histidine              | 7.07(s)                                                                          | 1.23 | 1.24 | 0.033 | <1   | 1.02 | 0.837 | <1   | 0.97 | 0.751 | <1   | 1.07 | 0.589 |
| 26 | Formate                | 8.46(s)                                                                          | 1.85 | 0.63 | 0.001 | <1   | 1.17 | 0.13  | <1   | 1.06 | 0.553 | <1   | 1.02 | 0.752 |
