# Supplementary material for: The Water Extract of Rhubarb Prevents Ischemic Stroke by Regulating Gut Bacteria and Metabolic Pathways
Source: MDPI journal article supplement (doi:10.3390/metabo14040216), 2024-04-12
Supplement: s1 [file s1]

**Supplementary Table S1. Major chemical compounds of RR identified by UHPLC-Q-Exactive****MS**

| NO. | <i>t</i> R/min | Formula                                         | Measured mass ( <i>m/z</i> ) | Presumed compound                                                         |
|-----|----------------|-------------------------------------------------|------------------------------|---------------------------------------------------------------------------|
| 1   | 0.85           | C <sub>5</sub> H <sub>5</sub> N <sub>5</sub>    | 134.0474                     | Adenine                                                                   |
| 2   | 0.86           | C <sub>6</sub> H <sub>8</sub> O <sub>7</sub>    | 191.0201                     | Citric acid                                                               |
| 3   | 1.07           | C <sub>4</sub> H <sub>6</sub> O <sub>5</sub>    | 133.0144                     | Malic acid                                                                |
| 4   | 2.12           | C <sub>13</sub> H <sub>16</sub> O <sub>10</sub> | 331.0677                     | Galloyl glucoside                                                         |
| 5   | 2.15           | C <sub>7</sub> H <sub>6</sub> O <sub>5</sub>    | 169.0145                     | Gallic acid                                                               |
| 6   | 2.58           | C <sub>19</sub> H <sub>26</sub> O <sub>15</sub> | 493.1212                     | Gallic-O-di-glucoside                                                     |
| 7   | 2.65           | C <sub>9</sub> H <sub>11</sub> NO <sub>2</sub>  | 164.072                      | Phenylalanine                                                             |
| 8   | 5.03           | C <sub>8</sub> H <sub>8</sub> O <sub>5</sub>    | 183.0302                     | Methyl gallate                                                            |
| 9   | 5.13           | C <sub>15</sub> H <sub>18</sub> O <sub>8</sub>  | 325.0938                     | P-coumaric acid-O-glucoside                                               |
| 10  | 5.83           | C <sub>7</sub> H <sub>6</sub> O <sub>3</sub>    | 137.0246                     | Salicylic acid                                                            |
| 11  | 5.89           | C <sub>30</sub> H <sub>26</sub> O <sub>12</sub> | 577.1365                     | Procyanidin B                                                             |
| 12  | 5.89           | C <sub>15</sub> H <sub>14</sub> O <sub>6</sub>  | 289.0725                     | (+)-epicatechin                                                           |
| 13  | 6.39           | C <sub>20</sub> H <sub>20</sub> O <sub>14</sub> | 483.0787                     | Gallic acid-O-galloyl-glucoside                                           |
| 14  | 6.85           | C <sub>15</sub> H <sub>14</sub> O <sub>6</sub>  | 289.0724                     | (+)-Catechin                                                              |
| 15  | 7.05           | C <sub>16</sub> H <sub>20</sub> O <sub>9</sub>  | 355.1052                     | Ferulic acid-O-glucoside                                                  |
| 16  | 7.52           | C <sub>19</sub> H <sub>22</sub> O <sub>9</sub>  | 393.1207                     | 6-Hydroxy-musizin-8-O-glucoside                                           |
| 17  | 8.29           | C <sub>27</sub> H <sub>30</sub> O <sub>15</sub> | 593.1528                     | Emodin-O-di-glucoside                                                     |
| 18  | 9.25           | C <sub>45</sub> H <sub>38</sub> O <sub>18</sub> | 865.1944                     | Tri-catechin                                                              |
| 19  | 9.48           | C <sub>20</sub> H <sub>20</sub> O <sub>12</sub> | 451.0841                     | 1-O-p-hydroxybenzoyl-6-O-galloyl-glucoside                                |
| 20  | 9.69           | C <sub>22</sub> H <sub>22</sub> O <sub>12</sub> | 477.1041                     | 1-O-p-coumaryl-6-O-galloyl-glucoside/1-O-galloyl-6-O-p-coumaryl-glucoside |
| 21  | 9.96           | C <sub>44</sub> H <sub>34</sub> O <sub>20</sub> | 881.1594                     | ProcyanidinB-2,3,3'-di-O-gallate/procyandin B-5,3,3'-di-O-gallate         |
| 22  | 9.96           | C <sub>9</sub> H <sub>8</sub> O <sub>3</sub>    | 163.0403                     | P-Coumaric acid                                                           |
| 23  | 10.13          | C <sub>23</sub> H <sub>24</sub> O <sub>13</sub> | 507.1155                     | Ferulic acid-O-gallyl-glucoside                                           |

|    |       |                                                 |          |                                                                                             |
|----|-------|-------------------------------------------------|----------|---------------------------------------------------------------------------------------------|
| 24 | 10.4  | C <sub>28</sub> H <sub>28</sub> O <sub>15</sub> | 603.137  | Catechin-O-gallioyl-<br>Glucoside/epicatechin-O-gallioyl-<br>glucoside                      |
| 25 | 10.44 | C <sub>12</sub> H <sub>10</sub> O <sub>5</sub>  | 233.0462 | 2-methyl-5-carboxymethyl-7-<br>hydroxychromogen                                             |
| 26 | 10.47 | C <sub>11</sub> H <sub>10</sub> O <sub>3</sub>  | 189.0561 | 2,5-dimethyl-7-hydroxychromone                                                              |
| 27 | 10.93 | C <sub>21</sub> H <sub>20</sub> O <sub>10</sub> | 431.099  | Vitexin                                                                                     |
| 28 | 10.98 | C <sub>27</sub> H <sub>30</sub> O <sub>16</sub> | 609.1459 | Rutinum                                                                                     |
| 29 | 11.16 | C <sub>23</sub> H <sub>26</sub> O <sub>11</sub> | 477.1415 | Isolindleyin                                                                                |
| 30 | 11.22 | C <sub>44</sub> H <sub>34</sub> O <sub>20</sub> | 881.1595 | ProcyanidinB-2,3,3'-di-O-<br>gallate/procyanidin B-5,3,3'-di-O-<br>gallate                  |
| 31 | 11.25 | C <sub>42</sub> H <sub>38</sub> O <sub>20</sub> | 861.1909 | Sennoside B                                                                                 |
| 32 | 11.41 | C <sub>21</sub> H <sub>18</sub> O <sub>11</sub> | 445.0798 | Rhein-8-O-glucoside                                                                         |
| 33 | 11.57 | C <sub>23</sub> H <sub>26</sub> O <sub>11</sub> | 477.1421 | Lindleyin                                                                                   |
| 34 | 11.7  | C <sub>22</sub> H <sub>18</sub> O <sub>10</sub> | 441.0834 | (+) Catechin gallate/ (-)<br>Epicatechin gallate                                            |
| 35 | 11.83 | C <sub>21</sub> H <sub>22</sub> O <sub>9</sub>  | 417.1192 | Aloin/Isomer                                                                                |
| 36 | 11.92 | C <sub>37</sub> H <sub>30</sub> O <sub>16</sub> | 729.1494 | Procyanidin B-O-gallate                                                                     |
| 37 | 12.02 | C <sub>22</sub> H <sub>22</sub> O <sub>12</sub> | 477.1034 | 1-O-p-coumaryl-6-O-galloyl-<br>glucoside/1-O-galloyl-6-O-p-<br>coumaryl-glucoside           |
| 38 | 12.05 | C <sub>15</sub> H <sub>10</sub> O <sub>7</sub>  | 303.0518 | Quercetin                                                                                   |
| 39 | 12.26 | C <sub>13</sub> H <sub>14</sub> O <sub>4</sub>  | 233.0824 | 2-(2'-hydroxypropyl)-5-methyl-7-<br>hydroxychromone                                         |
| 40 | 12.33 | C <sub>42</sub> H <sub>40</sub> O <sub>19</sub> | 847.2122 | Sennoside C                                                                                 |
| 41 | 12.33 | C <sub>27</sub> H <sub>26</sub> O <sub>12</sub> | 541.1367 | Resveratrol-4'-O-(6"-O-galloyl)-<br>glucoside/resveratrol-4'-O-(2"-<br>O-galloyl)-glucoside |
| 42 | 12.5  | C <sub>15</sub> H <sub>18</sub> O <sub>7</sub>  | 309.0974 | 2-O-cinnamoyl-beta-D-glucose                                                                |
| 43 | 12.56 | C <sub>29</sub> H <sub>26</sub> O <sub>16</sub> | 629.1159 | P-coumaric acid-O-di-galloyl-<br>glucoside                                                  |
| 44 | 12.76 | C <sub>42</sub> H <sub>38</sub> O <sub>20</sub> | 861.1907 | Sennoside A                                                                                 |
| 45 | 12.79 | C <sub>13</sub> H <sub>12</sub> O <sub>4</sub>  | 231.0667 | 2-methyl-5-acetonyl-7-<br>hydroxychromone                                                   |
| 46 | 13.03 | C <sub>24</sub> H <sub>22</sub> O <sub>13</sub> | 517.0998 | Emodin-O-malony-<br>glucoside/aloe-emodin-O-malony-<br>glucoside                            |

|    |       |                                                 |          |                                                                     |
|----|-------|-------------------------------------------------|----------|---------------------------------------------------------------------|
| 47 | 13.61 | C <sub>24</sub> H <sub>22</sub> O <sub>12</sub> | 501.1051 | Chrysophanol-8-O-β-D-(6'-O-acetyl) glucoside                        |
| 48 | 13.7  | C <sub>19</sub> H <sub>22</sub> O <sub>9</sub>  | 393.1202 | Aloesone-O-glucoside                                                |
| 49 | 13.77 | C <sub>26</sub> H <sub>28</sub> O <sub>13</sub> | 547.1451 | 2-(2'-hydroxypropyl)-5-methyl-7-hydroxytryptane-O-galloyl-glucoside |
| 50 | 13.87 | C <sub>16</sub> H <sub>12</sub> O <sub>6</sub>  | 299.0566 | Fallacinol                                                          |
| 51 | 14.14 | C <sub>30</sub> H <sub>30</sub> O <sub>15</sub> | 629.1538 | 4-(4'-hydroxyphenyl)-2-butanone-O-butanone-O-di-galloyl-glucoside   |
| 52 | 14.24 | C <sub>21</sub> H <sub>20</sub> O <sub>10</sub> | 431.0991 | Aloe-emodin-8-O-β-D-glucoside                                       |
| 53 | 14.24 | C <sub>22</sub> H <sub>22</sub> O <sub>11</sub> | 461.1103 | 1-O-galloyl-2-O-cinnamoyl-β-D-glucoside                             |
| 54 | 14.53 | C <sub>22</sub> H <sub>20</sub> O <sub>11</sub> | 459.0938 | Carboxyl chrysophanol-O-glucoside                                   |
| 55 | 15.21 | C <sub>42</sub> H <sub>40</sub> O <sub>19</sub> | 847.2116 | Sennoside D                                                         |
| 56 | 15.45 | C <sub>42</sub> H <sub>40</sub> O <sub>18</sub> | 831.2167 | Chrysophanol (10-10') rhein type sennosides                         |
| 57 | 15.66 | C <sub>23</sub> H <sub>20</sub> O <sub>12</sub> | 487.0842 | Rhein-O-acetyl-glucoside                                            |
| 58 | 15.93 | C <sub>20</sub> H <sub>24</sub> O <sub>9</sub>  | 407.1351 | Torachrysone-8-O-glucoside                                          |
| 59 | 16.37 | C <sub>15</sub> H <sub>12</sub> O <sub>6</sub>  | 287.0566 | Eriodictyol                                                         |
| 60 | 16.51 | C <sub>23</sub> H <sub>22</sub> O <sub>11</sub> | 473.1098 | Emodin-O-acetyl-glucoside                                           |
| 61 | 16.8  | C <sub>21</sub> H <sub>20</sub> O <sub>9</sub>  | 415.103  | Chrysophanol 8-O-glucoside/Chrysophanol 1-O-glucoside               |
| 62 | 17    | C <sub>45</sub> H <sub>42</sub> O <sub>21</sub> | 917.2175 | Chrysophanol (10-10') rhein type sennosides                         |
| 63 | 17.03 | C <sub>26</sub> H <sub>30</sub> O <sub>10</sub> | 501.1783 | 4-(4'-hydroxyphenyl)-2-butanone-O-feruloyl-glucoside                |
| 64 | 17.17 | C <sub>21</sub> H <sub>20</sub> O <sub>10</sub> | 431.0992 | Emodin-8-glucoside                                                  |
| 65 | 17.26 | C <sub>21</sub> H <sub>20</sub> O <sub>9</sub>  | 415.1042 | Chrysophanol 8-O-glucoside/Chrysophanol 1-O-glucoside               |
| 66 | 17.3  | C <sub>29</sub> H <sub>26</sub> O <sub>15</sub> | 613.1213 | Cinnamic acid-O-di-galloyl-glucoside                                |
| 67 | 17.98 | C <sub>16</sub> H <sub>10</sub> O <sub>7</sub>  | 313.0362 | Laccaic acid D                                                      |
| 68 | 19.2  | C <sub>23</sub> H <sub>22</sub> O <sub>10</sub> | 457.1133 | Chrysophanol-O-acetyl-glucoside                                     |
| 69 | 19.26 | C <sub>22</sub> H <sub>22</sub> O <sub>10</sub> | 445.1156 | Physcion-8-O-β-D-glucoside                                          |

|    |       |                                                               |          |                                                                                      |
|----|-------|---------------------------------------------------------------|----------|--------------------------------------------------------------------------------------|
| 70 | 19.26 | C <sub>16</sub> H <sub>12</sub> O <sub>5</sub>                | 283.0618 | Physcion                                                                             |
| 71 | 20.01 | C <sub>32</sub> H <sub>32</sub> O <sub>13</sub>               | 623.1789 | 4- (4' -hydroxyphenyl) -2-<br>butanone-O-cinnamyl-gallyl-<br>glucoside               |
| 72 | 20.01 | C <sub>15</sub> H <sub>10</sub> O <sub>6</sub>                | 285.0411 | Citreorosein                                                                         |
| 73 | 20.11 | C <sub>23</sub> H <sub>22</sub> O <sub>11</sub>               | 473.11   | Aloe-emodin-O-acetyl-glucoside                                                       |
| 74 | 20.32 | C <sub>33</sub> H <sub>34</sub> O <sub>14</sub>               | 653.1899 | 4- (4' -hydroxyphenyl) -2-<br>butanone-O-feruloyl-gallyl-<br>glucoside               |
| 75 | 21.11 | C <sub>24</sub> H <sub>24</sub> O <sub>11</sub>               | 487.1264 | Physcion-O-acetyl-glucoside                                                          |
| 76 | 21.11 | C <sub>16</sub> H <sub>12</sub> O <sub>5</sub>                | 283.0618 | 6-methyl-aloe-emodin                                                                 |
| 77 | 21.48 | C <sub>16</sub> H <sub>10</sub> O <sub>6</sub>                | 297.0411 | 6-methyl-rhein                                                                       |
| 78 | 22.76 | C <sub>33</sub> H <sub>30</sub> O <sub>13</sub>               | 633.1622 | 2, 5-dimethyl-7-hydroxytryptane-<br>O-cinnamyl-gallyl-glucoside                      |
| 79 | 22.79 | C <sub>15</sub> H <sub>10</sub> O <sub>5</sub>                | 269.0461 | Aloe-emodin                                                                          |
| 80 | 23.62 | C <sub>32</sub> H <sub>32</sub> O <sub>12</sub>               | 607.1846 | 4-(4'-hydroxyphenyl)-2-butanone-<br>4'-O-(2"-O-cinnamoyl-6"-O-<br>galloyl)-glucoside |
| 81 | 23.86 | C <sub>15</sub> H <sub>8</sub> O <sub>6</sub>                 | 283.0255 | Rhein                                                                                |
| 82 | 24.69 | C <sub>15</sub> H <sub>12</sub> O <sub>4</sub>                | 255.0669 | Emodinanthrone                                                                       |
| 83 | 24.84 | C <sub>31</sub> H <sub>26</sub> O <sub>12</sub>               | 589.1365 | 1-methyl-8-hydroxy-9,10-<br>anthraquinone-3-O-(6'-O-<br>cinnamoyl)-glucoside         |
| 84 | 27.76 | C <sub>15</sub> H <sub>12</sub> O <sub>3</sub>                | 239.0719 | Chrysophanol-9-anthrone                                                              |
| 85 | 29.24 | C <sub>15</sub> H <sub>10</sub> O <sub>5</sub>                | 269.0461 | Emodin                                                                               |
| 86 | 30.93 | C <sub>30</sub> H <sub>20</sub> O <sub>9</sub>                | 523.1045 | Sennidin C                                                                           |
| 87 | 31.59 | C <sub>15</sub> H <sub>10</sub> O <sub>6</sub>                | 285.0411 | Kaempferol                                                                           |
| 88 | 33.63 | C <sub>15</sub> H <sub>10</sub> O <sub>4</sub>                | 253.0512 | Chrysophanol                                                                         |
| 89 | 33.63 | C <sub>30</sub> H <sub>22</sub> O <sub>8</sub>                | 509.125  | Emodin bianthrone                                                                    |
| 90 | 0.87  | C <sub>5</sub> H <sub>5</sub> N <sub>5</sub>                  | 136.0621 | Adenine                                                                              |
| 91 | 1.33  | C <sub>10</sub> H <sub>13</sub> N <sub>5</sub> O <sub>4</sub> | 268.1043 | Adenosine                                                                            |
| 92 | 1.46  | C <sub>7</sub> H <sub>6</sub> O <sub>5</sub>                  | 171.0291 | Gallic acid                                                                          |
| 93 | 4.47  | C <sub>30</sub> H <sub>26</sub> O <sub>12</sub>               | 579.1486 | Procyanidin B                                                                        |
| 94 | 6.83  | C <sub>15</sub> H <sub>14</sub> O <sub>6</sub>                | 291.0871 | (+)-Catechin                                                                         |

|     |       |                                                |          |                                                       |
|-----|-------|------------------------------------------------|----------|-------------------------------------------------------|
| 95  | 11.97 | C <sub>15</sub> H <sub>14</sub> O <sub>4</sub> | 259.0969 | Rhapontigenin                                         |
| 96  | 12.79 | C <sub>16</sub> H <sub>10</sub> O <sub>7</sub> | 315.0505 | Laccaic Acid D                                        |
| 97  | 14.55 | C <sub>16</sub> H <sub>10</sub> O <sub>6</sub> | 299.0555 | 6-methyl-rhein                                        |
| 98  | 16.73 | C <sub>20</sub> H <sub>24</sub> O <sub>9</sub> | 409.1498 | Torachrysone 8-O-glucoside                            |
| 99  | 17.25 | C <sub>21</sub> H <sub>20</sub> O <sub>9</sub> | 439.1007 | Chrysophanol 8-O-glucoside/Chrysophanol 1-O-glucoside |
| 100 | 23.71 | C <sub>16</sub> H <sub>12</sub> O <sub>5</sub> | 285.0762 | Physcion                                              |
